# Supplementary material
Source: PubMed Central journal article supplement (PMC2669314)
Supplement: NIHMS96662-supplement-1_si_001.pdf [file NIHMS96662-supplement-1_si_001.pdf]

## Supporting Information

### Identificaiton of Shc Src Homology 2 Domain-Binding Peptoid – Peptide Hybrids

Won Jun Choi,<sup>1</sup> Sung-Eun Kim,<sup>1</sup> Andrew G. Stephen,<sup>2</sup> Iwona Weidlich,<sup>1,†</sup> Alessio Giubellino,<sup>3</sup> fa Liu,<sup>1</sup> Karen M. Worthy,<sup>2</sup> Lakshman Bindu,<sup>2</sup> Matthew J. Fivash,<sup>4</sup> Marc C. Nicklaus,<sup>1</sup> Donald P. Bottaro,<sup>3</sup> Robert J. Fisher,<sup>2</sup> and Terrence R. Burke, Jr.<sup>1,\*</sup>

<sup>1</sup>Laboratory of Medicinal Chemistry, CCR, NCI, NIH, Frederick, MD 21702 and <sup>2</sup>Protein Chemistry Laboratory, Advanced Technology Program, SAIC-Frederick, Frederick MD 21702 and <sup>3</sup>Urologic Oncology Branch, CCR, NCI, NIH, Bethesda, MD 20892 and <sup>4</sup>Data Management Services, Inc., NCI-Frederick, Frederick MD 21702

**Contents:** Mass spectral data for synthetic peptides

**Table of Mass Spectral Data**

| No. | Molecular Formula                                                  | Calcd.  | Found   |
|-----|--------------------------------------------------------------------|---------|---------|
| 6   | C <sub>49</sub> H <sub>56</sub> N <sub>9</sub> O <sub>17</sub> PS  | 1106.06 | 1106.66 |
| 7   | C <sub>50</sub> H <sub>58</sub> N <sub>9</sub> O <sub>17</sub> PS  | 1120.08 | 1119.73 |
| 8   | C <sub>51</sub> H <sub>60</sub> N <sub>9</sub> O <sub>17</sub> PS  | 1134.11 | 1134.82 |
| 9   | C <sub>52</sub> H <sub>62</sub> N <sub>9</sub> O <sub>17</sub> PS  | 1148.14 | 1147.69 |
| 11  | C <sub>55</sub> H <sub>67</sub> N <sub>10</sub> O <sub>18</sub> PS | 1219.22 | 1218.77 |
| 12  | C <sub>56</sub> H <sub>69</sub> N <sub>10</sub> O <sub>18</sub> PS | 1233.24 | 1232.79 |
| 13  | C <sub>57</sub> H <sub>71</sub> N <sub>10</sub> O <sub>18</sub> PS | 1247.27 | 1247.82 |
| 14  | C <sub>56</sub> H <sub>69</sub> N <sub>10</sub> O <sub>18</sub> PS | 1233.24 | 1232.79 |
| 16  | C <sub>50</sub> H <sub>58</sub> N <sub>9</sub> O <sub>18</sub> PS  | 1136.08 | 1136.38 |
| 17  | C <sub>50</sub> H <sub>58</sub> N <sub>9</sub> O <sub>18</sub> PS  | 1136.08 | 1136.48 |
| 18  | C <sub>50</sub> H <sub>56</sub> N <sub>9</sub> O <sub>17</sub> PS  | 1118.07 | 1118.01 |
| 19  | C <sub>51</sub> H <sub>59</sub> N <sub>10</sub> O <sub>17</sub> PS | 1147.11 | 1147.70 |
| 20  | C <sub>53</sub> H <sub>62</sub> N <sub>9</sub> O <sub>17</sub> PS  | 1160.15 | 1182.65 |
| 21  | C <sub>53</sub> H <sub>56</sub> N <sub>9</sub> O <sub>17</sub> PS  | 1154.1  | 1154.64 |
| 22  | C <sub>53</sub> H <sub>58</sub> N <sub>9</sub> O <sub>17</sub> PS  | 1156.12 | 1155.97 |
| 23  | C <sub>54</sub> H <sub>58</sub> N <sub>9</sub> O <sub>17</sub> PS  | 1168.13 | 1168.66 |
| 24  | C <sub>54</sub> H <sub>58</sub> N <sub>9</sub> O <sub>17</sub> PS  | 1168.13 | 1168.71 |
| 25  | C <sub>52</sub> H <sub>60</sub> N <sub>9</sub> O <sub>17</sub> PS  | 1146.12 | 1146.78 |
| 26  | C <sub>53</sub> H <sub>62</sub> N <sub>9</sub> O <sub>17</sub> PS  | 1160.15 | 1160.95 |
| 27  | C <sub>54</sub> H <sub>58</sub> N <sub>9</sub> O <sub>17</sub> PS  | 1168.13 | 1168.17 |
| 28  | C <sub>54</sub> H <sub>64</sub> N <sub>9</sub> O <sub>17</sub> PS  | 1174.17 | 1174.75 |
| 34  | C <sub>33</sub> H <sub>50</sub> N <sub>7</sub> O <sub>12</sub> P   | 767.76  | 790.41  |
| 36  | C <sub>34</sub> H <sub>52</sub> N <sub>7</sub> O <sub>12</sub> P   | 781.79  | 804.56  |
| 37  | C <sub>34</sub> H <sub>52</sub> N <sub>7</sub> O <sub>12</sub> P   | 781.79  | 804.40  |
| 39  | C <sub>30</sub> H <sub>45</sub> N <sub>6</sub> O <sub>10</sub> P   | 680.69  | 703.50  |
| 40  | C <sub>30</sub> H <sub>45</sub> N <sub>6</sub> O <sub>10</sub> P   | 680.69  | 703.58  |
| 41  | C <sub>30</sub> H <sub>45</sub> N <sub>6</sub> O <sub>10</sub> P   | 680.69  | 703.26  |

|    |                                                                                 |        |        |
|----|---------------------------------------------------------------------------------|--------|--------|
| 43 | C <sub>31</sub> H <sub>47</sub> N <sub>6</sub> O <sub>10</sub> P                | 694.71 | 717.16 |
| 44 | C <sub>31</sub> H <sub>47</sub> N <sub>6</sub> O <sub>10</sub> P                | 694.71 | 717.25 |
| 46 | C <sub>26</sub> H <sub>41</sub> N <sub>6</sub> O <sub>10</sub> P                | 628.61 | 650.52 |
| 47 | C <sub>27</sub> H <sub>43</sub> N <sub>6</sub> O <sub>10</sub> P                | 642.64 | 664.54 |
| 48 | C <sub>27</sub> H <sub>41</sub> N <sub>6</sub> O <sub>10</sub> P                | 640.62 | 662.59 |
| 49 | C <sub>28</sub> H <sub>45</sub> N <sub>6</sub> O <sub>10</sub> P                | 656.66 | 678.68 |
| 50 | C <sub>28</sub> H <sub>43</sub> N <sub>6</sub> O <sub>10</sub> P                | 654.65 | 676.59 |
| 51 | C <sub>31</sub> H <sub>43</sub> N <sub>6</sub> O <sub>10</sub> P                | 690.68 | 712.68 |
| 52 | C <sub>28</sub> H <sub>41</sub> N <sub>6</sub> O <sub>10</sub> P                | 652.63 | 674.69 |
| 53 | C <sub>29</sub> H <sub>47</sub> N <sub>6</sub> O <sub>10</sub> P                | 670.69 | 692.98 |
| 54 | C <sub>28</sub> H <sub>44</sub> FN <sub>6</sub> O <sub>10</sub> P               | 674.66 | 696.95 |
| 55 | C <sub>28</sub> H <sub>42</sub> F <sub>3</sub> N <sub>6</sub> O <sub>10</sub> P | 710.64 | 733.02 |
| 56 | C <sub>27</sub> H <sub>43</sub> N <sub>6</sub> O <sub>11</sub> P                | 658.64 | 680.84 |
| 57 | C <sub>30</sub> H <sub>49</sub> N <sub>6</sub> O <sub>10</sub> P                | 684.72 | 706.99 |
| 58 | C <sub>29</sub> H <sub>47</sub> N <sub>6</sub> O <sub>10</sub> P                | 670.69 | 692.75 |
| 59 | C <sub>29</sub> H <sub>45</sub> N <sub>6</sub> O <sub>10</sub> P                | 668.68 | 690.81 |
| 60 | C <sub>29</sub> H <sub>43</sub> N <sub>6</sub> O <sub>10</sub> P                | 666.66 | 688.96 |
| 61 | C <sub>28</sub> H <sub>45</sub> N <sub>6</sub> O <sub>11</sub> P                | 672.66 | 694.93 |
| 62 | C <sub>28</sub> H <sub>45</sub> N <sub>6</sub> O <sub>10</sub> PS               | 688.73 | 710.95 |
| 63 | C <sub>30</sub> H <sub>49</sub> N <sub>6</sub> O <sub>10</sub> P                | 684.72 | 706.94 |
| 64 | C <sub>30</sub> H <sub>47</sub> N <sub>6</sub> O <sub>10</sub> P                | 682.7  | 705.04 |
| 65 | C <sub>29</sub> H <sub>44</sub> N <sub>7</sub> O <sub>10</sub> P                | 681.67 | 703.95 |
|    |                                                                                 |        |        |
